# Supplementary material for: Large-scale F0 CRISPR screens in vivo using MIC-Drop
Source: Springer Nature journal article supplement (doi:10.1038/s41596-023-00821-y), 2023-04-17
Supplement: MOESM2 [file 41596_2023_821_MOESM2_ESM13.xlsx]

## Sheet: Sheet1
Oligo Name	Oligo Sequences	Notes
Gene-specific forward oligo	ATTTAGGTGACACTATAgnnnnnnnnnnnnnnnnnnnGTTTTAGAGCTAGAAATAGC	Red: SP6 promoter; Blue: sgRNA target/spacer sequence
sgRNA universal reverse oligo	AAAAGCACCGACTCGGTGCCACTTTTTCA AGTTGATAACGGACTAGCCTTATTTTAACTTGCTATTTCTAGCTCTAAAAC
Barcode forward	/5BiosG/CGTAATACGACTCACTATAGGGCTTCAGCCAAGGAAGCTACATTTAGGTGACACTATAGn	/5BiosG/ refers to Biotin modification on 5' end of the oligo; Orange: T7 forward primer sequence
Barcode Reverse	/5BiosG/GCTAGTTATTGCTCAGCGGGTCTTGTTTCTCGGTGTGCTTGCTATTTCTAGCTCTAAAAC	/5BiosG/ refers to Biotin modification on 5' end of the oligo; Green: T7 reverse primer sequence
Barcode sequencing forward	GTGTAAAACGACGGCCAGTATGGCACCAACTCGATGACGTAATACGACTCACTATAGGGC	Purple: M13 forward primer sequence
Barcode sequencing reverse	CAGGAAACAGCTATGACATAGTCCTGCTGTACCAGGCGTCTGCTAGTTATTGCTCAGCGG	Brown: M13 reverse primer sequence
sgRNA Name	sgRNA target/spacer sequence
rx3-sgRNA-1	GATCTGCCAGACGCGGATGG
rx3-sgRNA-2	GAGCTCGTGGAGCTGGAAGG
rx3-sgRNA-3	GGGAGAGACTCTGTTTCACC
rx3-sgRNA-4	GAGCACTTGTCCCCGAAAA
tbx16-sgRNA-1	GCCGGTGATTCCTACCATCA
tbx16-sgRNA-2	GTGGACATGGTACCAGAAGA
tbx16-sgRNA-3	GGGTGCAGGTACGTCCTGTA
tbx16-sgRNA-4	GAAGCTCACCAATAACGCAC
scrambled-sgRNA-1	GATTAGTCGGTGCGCGTGAA
scrambled-sgRNA-2	GGAGCATGTACGAGTTGCTG
scrambled-sgRNA-3	GATCCGCCTGTAGTCTCGCA
scrambled-sgRNA-4	GACGGGCAGTCTAGCGTGTC
